# Supplementary material for: Immunohistological Evaluation of Von Willebrand Factor in the Left Atrial Endocardium and Atrial Thrombi from Cats with Cardiomyopathy
Source: MDPI journal article supplement (doi:10.3390/ani11051240), 2021-04-26
Supplement: s1 [file s1]

## Supplementary Materials—Tables:

**Table S1:** Pathology classification criteria for feline cardiomyopathies [33].

| Cardiomyopathy      | Macroscopic Criteria                                                                                       | Microscopic criteria                                                                                                                                                                                       |
|---------------------|------------------------------------------------------------------------------------------------------------|------------------------------------------------------------------------------------------------------------------------------------------------------------------------------------------------------------|
| HCM                 | +/- LVH (subjective)<br>+/- LA or biatrial dilation                                                        | Myofibre disarray $\geq 5\%$ of LV<br>+/- Myocyte hypertrophy<br>+/- Interstitial fibrosis<br>+/- Intramural arteriosclerosis                                                                              |
| HCM with LV infarct | Regional or global LV wall thinning<br>LV dilation<br>LA or biatrial dilation                              | Myofibre disarray $\geq 5\%$ of LV<br>Replacement fibrosis<br>+/- Myocyte hypertrophy<br>+/- Interstitial fibrosis<br>+/- Intramural arteriosclerosis                                                      |
| eRCM                | Fibrous/fibromuscular tissue bridging LV<br>OR<br>Diffuse endomyocardial fibrosis involving most of the LV | Endocardial thickening<br>Fibrosis +/- or granulation tissue extending to involve the subendocardial myocardium<br>+/- Myocyte hypertrophy<br>+/- Interstitial fibrosis<br>+/- Intramural arteriosclerosis |

**Table S2:** Echocardiographic classification criteria for feline cardiomyopathies [33,36].

| Cardiomyopathy           | Diagnostic Criteria                                                                                                                                                                                                     |
|--------------------------|-------------------------------------------------------------------------------------------------------------------------------------------------------------------------------------------------------------------------|
| HCM                      | Diastolic LV wall thickness $\geq 6$ mm<br>+/- papillary muscle hypertrophy<br>+/- SAM<br>+/- DLVOTO                                                                                                                    |
| HCM with LV wall infarct | Regional LV wall thinning with hypokinesis<br>LV systolic dysfunction<br>Possible regions of diastolic LV wall thickness $\geq 6$ mm<br>Possible LV dilation<br>LA or biatrial dilation                                 |
| eRCM                     | Diastolic wall thickness $\leq 5.5$ mm<br>Left atrial/biatrial dilation<br>End diastolic left ventricular diameter $< 20$ mm<br>Fractional shortening $\geq 26\%$<br>Fibrous tissue bridging the left ventricular lumen |

**Table S3:** Clinical presentation and echocardiography summary.

| Identifier | Presenting Signs                                 | Murmur | Arrhythmia | Gallop | Co-morbidities          | CHF | Reason for euthanasia                 | Echocardiography summary | Point of care echocardiography |
|------------|--------------------------------------------------|--------|------------|--------|-------------------------|-----|---------------------------------------|--------------------------|--------------------------------|
| Control 1  | Road trauma, tachypnoea                          | No     | No         | No     | Road trauma injuries    | No  | Multiple trauma                       | -                        | No abnormalities identified    |
| Control 2  | Road trauma, tachypnoea                          | No     | No         | No     | Road trauma injuries    | No  | Fractured pelvis and urethral rupture | -                        | No abnormalities identified    |
| Control 3  | Anuria                                           | No     | No         | No     | Renal disease           | No  | Progressive hyperkalaemia             | -                        | No abnormalities identified    |
| Control 4  | Abdominal distention, diarrhoea, vacant episodes | No     | No         | No     | Congenital PSS          | No  | Congenital PSS                        | -                        | No abnormalities identified    |
| Control 5  | Normal                                           | No     | No         | No     | None                    | No  | Unsociable behaviour                  | -                        | -                              |
| Control 6  | Ocular trauma                                    | No     | No         | No     | None                    | No  | Ocular trauma and aggression          | -                        | -                              |
| Control 7  | Normal                                           | No     | No         | No     | None                    | No  | Unsociable behaviour                  | -                        | -                              |
| Control 8  | Normal                                           | No     | No         | No     | None                    | No  | Unsociable behaviour                  | -                        | -                              |
| Control 9  | Normal                                           | No     | No         | No     | None                    | No  | Aggression, soiling in house          | -                        | -                              |
| Control 10 | Normal                                           | No     | No         | No     | None                    | No  | Unsociable behaviour                  | -                        | -                              |
| Control 11 | Tachypnoea, pyrexia                              | No     | No         | No     | Oesophagitis, pyothorax | No  | Obtundation                           | -                        | No abnormalities identified    |

|                      |                                            |     |     |     |                                        |     |                                                                       |                                                                                           |                                                           |
|----------------------|--------------------------------------------|-----|-----|-----|----------------------------------------|-----|-----------------------------------------------------------------------|-------------------------------------------------------------------------------------------|-----------------------------------------------------------|
| <b>Subclinical 1</b> | III/VI holosystolic murmur investigation   | Yes | No  | No  | None                                   | No  | Rehoming shelter cat                                                  | Mild LVH, LA WNL                                                                          | -                                                         |
| <b>Subclinical 2</b> | Neurological fore-brain signs              | No  | No  | No  | Neoplasia                              | No  | CNS neoplasia, poor prognosis                                         | -                                                                                         | LVH, LA WNL                                               |
| <b>Subclinical 3</b> | Chronic diarrhoea                          | No  | No  | No  | Inflammatory bowel disease             | No  | Severe haemorrhagic diarrhoea, poor prognosis                         | -                                                                                         | LVH, LA WNL                                               |
| <b>Subclinical 4</b> | Murmur                                     | Yes | No  | No  | None                                   | No  | Rehoming shelter cat                                                  | Mild LVH, LA WNL                                                                          | -                                                         |
| <b>Subclinical 5</b> | Progressive paraparesis                    | No  | No  | No  | Osteosarcoma with pulmonary metastasis | No  | Poor prognosis                                                        | -                                                                                         | LVH, LA WNL                                               |
| <b>Subclinical 6</b> | Discharging cat bite wounds, CNS signs     | No  | No  | No  | Sepsis                                 | No  | Obtundation, poor prognosis                                           | -                                                                                         | LVH, LAE                                                  |
| <b>Subclinical 7</b> | Trauma                                     | Yes | No  | No  | Mild anaemia, mild azotaemia           | No  | Pelvis fracture, spinal cord injury with no deep pain, non-ambulatory | -                                                                                         | LVH, LAE                                                  |
| <b>Subclinical 8</b> | Murmur, inappetence                        | No  | No  | No  | None                                   | No  | Rehoming shelter cat                                                  | Moderate LVH, LAE                                                                         | -                                                         |
| <b>Subclinical 9</b> | Murmur investigation                       | Yes | No  | No  | None                                   | No  | Owner request                                                         | Severe LVH, LAE                                                                           | -                                                         |
| <b>CHF 1</b>         | Severe dyspnoea/tachypnoea                 | Yes | No  | Yes | None                                   | Yes | Refractory Pulmonary oedema                                           | CHF, Severe LVH, LAE, B-lines                                                             | -                                                         |
| <b>CHF 2</b>         | Tachypnoea, inappetence                    | No  | No  | No  | None                                   | Yes | Financial constraints                                                 | Severe LAE, SEC, thrombus, LV areas of hypertrophy and thinning with hypokinesia, B-lines | -                                                         |
| <b>CHF 3</b>         | Severe tachypnoea                          | Yes | Yes | No  | None                                   | Yes | Refractory heart failure                                              | LVH, infarcted and thinned IVS, pleural fluid, severe LAE, RAE, RV enlargement B-lines    | -                                                         |
| <b>CHF 4</b>         | Tachypnoea                                 | Yes | No  | Yes | None                                   | Yes | CHF, poor prognosis                                                   | LAE, LVH, pulmonary oedema B-lines                                                        | -                                                         |
| <b>CHF 5</b>         | Severe tachypnoea                          | No  | No  | Yes | None                                   | Yes | CHF, poor prognosis                                                   | -                                                                                         | Severe LVH, LAE, pulmonary oedema, pleural effusion       |
| <b>CHF 6</b>         | Collapse, tachypnoea                       | Yes | No  | Yes | None                                   | Yes | Cardiogenic shock                                                     | -                                                                                         | LVH, LAE, pulmonary oedema (B-lines)                      |
| <b>CHF 7</b>         | Severe tachypnoea                          | No  | Yes | No  | None                                   | Yes | Refractory heart failure                                              | LAE, pleural effusion, LVH, infarcted hypomotile LVFW                                     | -                                                         |
| <b>CHF 8</b>         | Severe tachypnoea                          | No  | No  | No  | None                                   | Yes | Poor prognosis, financial constraints                                 | -                                                                                         | LVH and LAE pulmonary oedema (B-lines), thrombus          |
| <b>ATE 1</b>         | Hind limb paresis and pain,                | No  | No  | No  | None                                   | No  | ATE, poor prognosis                                                   | -                                                                                         | Severe HCM, LAE, SEC                                      |
| <b>ATE 2</b>         | Hind limb paresis and pain tachypnoea      | No  | No  | No  | None                                   | Yes | ATE, poor prognosis                                                   | Severe LVH and LAE, SEC, pleural fluid                                                    | -                                                         |
| <b>ATE 3</b>         | Hind limb paresis and pain, tachypnoea     | No  | Yes | No  | None                                   | Yes | ATE, poor prognosis                                                   | -                                                                                         | LAE, SEC, pulmonary oedema (B-lines), LVH                 |
| <b>ATE 4</b>         | Tachypnoea                                 | Yes | No  | No  | None                                   | Yes | ATE, poor prognosis                                                   | Severe LVH, mid-ventricular obstruction, pleural fluid SEC, Thrombus                      | -                                                         |
| <b>ATE 5</b>         | Hind limb paresis and pain                 | No  | -   | -   | -                                      | -   | ATE, poor prognosis                                                   | -                                                                                         | LAE, SEC, LVH                                             |
| <b>ATE 6</b>         | Hind limb paresis and pain, tachypnoea     | No  | No  | No  | None                                   | Yes | ATE, financial constraints                                            | LAE, LVH, pulmonary oedema (B-lines)                                                      | -                                                         |
| <b>ATE 7</b>         | Hind limb paresis and pain, tachypnoea     | -   | -   | -   | -                                      | -   | Poor prognosis, financial constraints -                               | -                                                                                         | LAE, SEC                                                  |
| <b>ATE 8</b>         | Tachypnoea, hind limb paresis, hypothermia | No  | No  | No  | None                                   | Yes | ATE, CHF, poor prognosis                                              | -                                                                                         | Severe LAE, LVH, pulmonary oedema (B-lines)               |
| <b>ATE 9</b>         | Hind limb paresis and pain                 | Yes | No  | No  | None                                   | No  | ATE, poor prognosis                                                   | -                                                                                         | LAE, SEC, LA Thrombus, LVH                                |
| <b>ATE 10</b>        | Tachypnoea, hind limb paresis, hypothermia | No  | No  | No  | None                                   | Yes | ATE, CHF, poor prognosis                                              | -                                                                                         | Severe LAE, LVH, pulmonary oedema (B-lines), SEC Thrombus |
| <b>ATE 11</b>        | Tachypnoea, hind limb paresis              | Yes | No  | No  | None                                   | Yes | ATE, CHF, poor prognosis, financial constraints                       | -                                                                                         | Severe LAE, LVH, pulmonary oedema (B-lines)               |

| *ATE 12 | Tachycardia, tachypnoea, right forelimb paresis | No | No | Yes | None | Yes | ATE, CHF | Severe LAE, LVH, B-lines |
|---------|-------------------------------------------------|----|----|-----|------|-----|----------|--------------------------|
|---------|-------------------------------------------------|----|----|-----|------|-----|----------|--------------------------|

Abbreviations: ATE, aortic thromboembolism; CHF, congestive heart failure; LAE, left atrial enlargement; RAE, right atrial enlargement; LVH, left ventricular hypertrophy, SEC, spontaneous echo contrast; IVS, interventricular septum; CNS, central nervous system; PSS, portal systemic shunt; HCM, hypertrophic cardiomyopathy. \* ATE 12 the LAA thrombus in situ was acquired from this extra cat that was collected later in the timeline and not included in the quantification of endocardial vWF.

**Table S4:** Signalment, echocardiographic parameters, and histopathology diagnosis.

| Identifier                 | Breed        | Gender | Age (yrs) | BW (kg) | BCS   | La/Ao | IVSd (mm) | LVFWd (mm) | SAM | SEC yes/no | LA Thrombus yes/no | Cardiac imaging | Histopathology |
|----------------------------|--------------|--------|-----------|---------|-------|-------|-----------|------------|-----|------------|--------------------|-----------------|----------------|
| Control 1                  | DSH          | F      | 5–8       | -       | 5/9   | 1.23  | -         | -          | -   | -          | -                  | POC             | Normal         |
| Control 2                  | DSH          | MN     | 1.6       | 5.9     | -     | 1.3   | -         | -          | -   | -          | -                  | POC             | Normal         |
| Control 3                  | DSH          | MN     | 5.8       | 4.4     | 5/9   | 1.35  | -         | -          | -   | No         | No                 | POC             | Normal         |
| Control 4                  | DSH          | F      | 0.2       | 3.9     | -     | 1.4   | -         | -          | -   | -          | -                  | POC             | Normal         |
| Control 5                  | DSH          | F      | <3        | -       | 6/9   | -     | -         | -          | -   | -          | -                  | -               | Normal         |
| Control 6                  | DSH          | M      | 4.0       | -       | 5/9   | -     | -         | -          | -   | -          | -                  | -               | Normal         |
| Control 7                  | DSH          | F      | <3        | -       | 5/9   | -     | -         | -          | -   | -          | -                  | -               | Normal         |
| Control 8                  | DSH          | F      | <3        | -       | -     | -     | -         | -          | -   | -          | -                  | -               | Normal         |
| Control 9                  | DSH          | F      | <3        | -       | 5/9   | -     | -         | -          | -   | -          | -                  | -               | Normal         |
| Control 10                 | DSH          | F      | 1.5       | -       | 5/9   | -     | -         | -          | -   | -          | -                  | -               | Normal         |
| Control 11                 | DSH          | FN     | 7.3       | 6.75    | -     | 1.3   | -         | -          | -   | No         | No                 | POC             | Normal         |
| Subclinical 1              | DSH          | MN     | 5         | 2.8     | 4/9   | 1.38  | 5.5       | 6.1        | No  | No         | No                 | Full Echo       | HCM            |
| Subclinical 2              | DLH          | FN     | 10.5      | 5       | 7/9   | 1.4   | -         | -          | -   | No         | No                 | POC             | HCM            |
| Subclinical 3              | DSH          | MN     | 4.5       | 3.9     | 3/9   | 1.25  | -         | -          | -   | No         | No                 | POC             | HCM            |
| Subclinical 4              | BSH          | FN     | 7.5       | 2.8     | 3/9   | 1.38  | 6.0       | 6.2        | No  | No         | No                 | Full Echo       | HCM            |
| Subclinical 5              | DSH          | MN     | 11        | 7.5     | 7/9   | 1.2   | -         | -          | -   | No         | No                 | POC             | HCM            |
| <sup>†</sup> Subclinical 6 | DSH          | MN     | 8.1       | 4.8     | 3.5/9 | 1.6   | -         | -          | -   | No         | No                 | POC             | HCM            |
| <sup>†</sup> Subclinical 7 | Bengal       | MN     | 5.4       | 6.4     | -     | 1.7   | -         | -          | -   | No         | No                 | POC             | HCM            |
| <sup>†</sup> Subclinical 8 | DSH          | MN     | 7.5       | 6.7     | 6/9   | 1.59  | 6.5       | 6.9        | No  | No         | No                 | Full Echo       | HCM            |
| <sup>†</sup> Subclinical 9 | DSH          | FN     | 2.5       | -       | 3/9   | 1.62  | 7.5       | 7.8        | Yes | No         | No                 | Full Echo       | HCM            |
| CHF 1                      | DSH          | MN     | 13        | 3.2     | 3/9   | 1.76  | 7.5       | 8.3        | Yes | No         | No                 | Full Echo       | HCM            |
| CHF 2                      | DSH          | MN     | 6         | 5.6     | 5/9   | 3.82  | 8.2       | 5.3        | No  | Yes        | No                 | Full Echo       | ES-HCM         |
| CHF 3                      | BSH          | MN     | 4         | 3.6     | -     | 1.8   | 3.8       | 8.0        | No  | No         | No                 | Full Echo       | ES-HCM         |
| CHF 4                      | Siamese      | MN     | 8         | -       | -     | 2.1   | 6.4       | 5.9        | Yes | No         | No                 | Full Echo       | eRCM           |
| CHF 5                      | DSH          | FN     | 8         | 5       | 4/9   | 2.7   | -         | -          | -   | -          | -                  | POC             | HCM            |
| CHF 6                      | DSH          | MN     | 2         | 4.0     | 3/9   | 2.2   | -         | -          | -   | -          | -                  | POC             | HCM            |
| CHF 7                      | Russian blue | MN     | 7         | 4.0     | 5/9   | 2.5   | 6.5       | 2.8        | No  | No         | No                 | Full Echo       | ES-HCM         |
| CHF 8                      | DSH          | FN     | 11        | 3.3     | -     | 1.9   | -         | -          | -   | -          | Yes                | POC             | HCM            |
| ATE 1                      | BSH          | MN     | 10        | 5.2     | -     | 3.1   | -         | -          | -   | Yes        | No                 | POC             | HCM            |
| ATE 2                      | BSH          | MN     | 6.9       | 4       | -     | 2.28  | 7.5       | 8.4        | No  | Yes        | No                 | Full Echo       | HCM            |
| ATE 3                      | DSH          | MN     | 10        | 4.3     | -     | 3.85  | -         | -          | -   | Yes        | No                 | POC             | HCM            |
| ATE 4                      | DSH          | MN     | 2         | 4.0     | -     | 2.94  | 8.5       | 10.8       | No  | Yes        | Yes                | Full Echo       | HCM            |
| ATE 5                      | Siamese      | MN     | 11        | 4.7     | 4/9   | 1.8   | -         | -          | -   | Yes        | -                  | POC             | HCM            |
| ATE 6                      | DSH          | MN     | 9.5       | -       | -     | 1.83  | 6.8       | 6.0        | No  | -          | No                 | Full Echo       | HCM            |
| ATE 7                      | DSH          | M      | 2         | 4.6     | -     | 2.11  | -         | -          | -   | Yes        | -                  | POC             | eRCM           |
| ATE 8                      | DSH          | MN     | 6         | -       | -     | 4.6   | -         | -          | -   | Yes        | -                  | POC             | HCM            |
| ATE 9                      | DLH          | MN     | 2         | 3.8     | -     | 2.03  | -         | -          | -   | Yes        | Yes                | POC             | HCM            |
| ATE 10                     | DSH          | MN     | 2         | 3.8     | -     | 3.28  | -         | -          | -   | Yes        | Yes                | POC             | HCM            |
| ATE 11                     | DSH          | MN     | 10        | -       | -     | 2.9   | -         | -          | -   | Yes        | -                  | POC             | HCM            |
| *ATE 12                    | DSH          | MN     | 7         | -       | -     | 2.5   | -         | -          | -   | -          | Yes (LAA)          | POC             | HCM            |

Abbreviations: DSH, domestic shorthair, DLH, domestic longhair; FN, female neutered; MN, male neutered; BW, body weight; BCS, body condition score; La/Ao, ratio of LA diameter and aorta diameter; IVSd, thickness of interventricular septum in diastole; LVFWd, thickness of left ventricular free wall in diastole; SAM, systolic anterior motion of the mitral valve; SEC, spontaneous echo contrast; POC, point of care; HCM, hypertrophic cardiomyopathy; ES-HCM, end-stage HCM (defined as cats with replacement fibrosis within their left ventricular myocardium); eRCM, restrictive cardiomyopathy endomyocardial form. \*ATE 12 the LAA thrombus in situ was acquired from this extra cat that was collected later in the timeline and not included in the quantification of endocardial vWF.

**Table S5:** Measurement of echocardiographic variables.

|                                                                        |                                                                                                                                                        |
|------------------------------------------------------------------------|--------------------------------------------------------------------------------------------------------------------------------------------------------|
| View: RPSAX at the level of the aortic valve                           | Ao: From the blood-tissue interface at the midpoint of the right aortic sinus to the commissure between the noncoronary and left coronary aortic cusps |
| Imaging modality: 2D Imaging                                           | LA: Extension of the aortic line to the blood-tissue interface of the left atrial wall, immediately lateral to the pulmonary vein                      |
| LA/Ao [38]                                                             |                                                                                                                                                        |
| Timing: Beginning of diastole, the first frame of aortic valve closure |                                                                                                                                                        |

|                                                                                                                                                       |                                                                                                                                                                                                                                                                                                                                            |                                                                                                                                                                                     |
|-------------------------------------------------------------------------------------------------------------------------------------------------------|--------------------------------------------------------------------------------------------------------------------------------------------------------------------------------------------------------------------------------------------------------------------------------------------------------------------------------------------|-------------------------------------------------------------------------------------------------------------------------------------------------------------------------------------|
| LVFWd<br>and IVSd<br>[39]                                                                                                                             | View: RPLAX4ch, RPLAX5ch, and RPSAX at the level of the<br>papillary muscles<br>Imaging modality: 2D Imaging<br>Timing: End-diastole, the last frame before the aortic valve<br>opens (RPLAX5ch), the first frame after the mitral valve<br>closes (RPLAX4ch), or when the left ventricular internal di-<br>ameter was the largest (RPSAX) | Leading edge technique avoiding the papil-<br>lary muscles or false tendon attachments<br>Average of 3 measurements from the area<br>that measures the maximal thickness is<br>used |
| RPSAX: Right parasternal short axis view. RPLAX4ch: Right parasternal long axis 4 chamber view. RPLAX5ch: Right parasternal long axis 5 chamber view. |                                                                                                                                                                                                                                                                                                                                            |                                                                                                                                                                                     |

### Supplementary Materials—Figures:

**Figure S1:** Gross appearance of the thrombi.

ATE 9

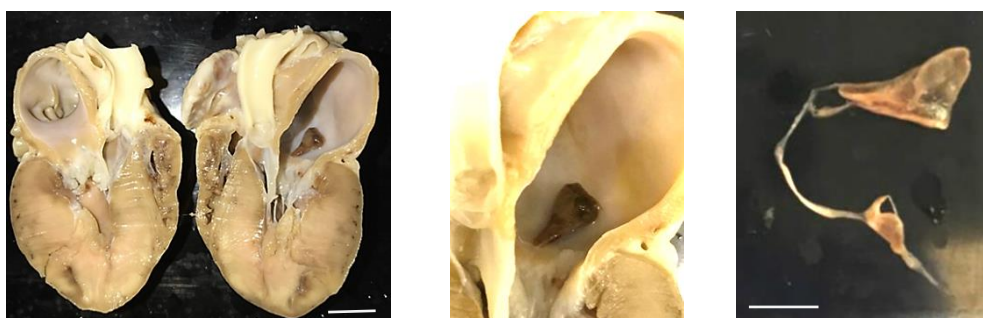

CHF 8

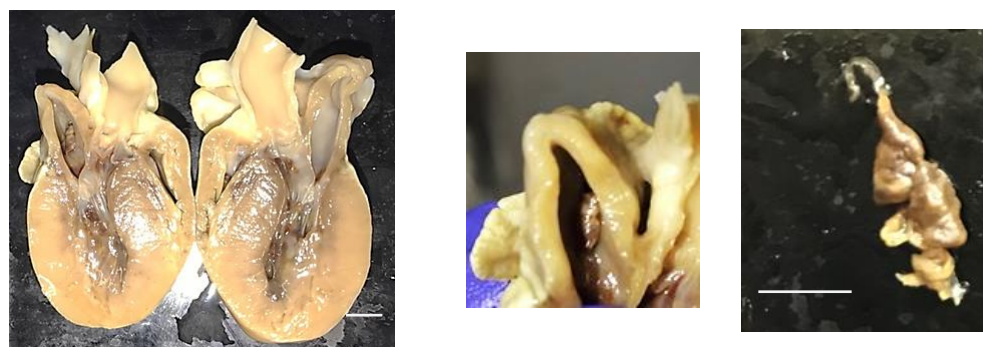

ATE 12

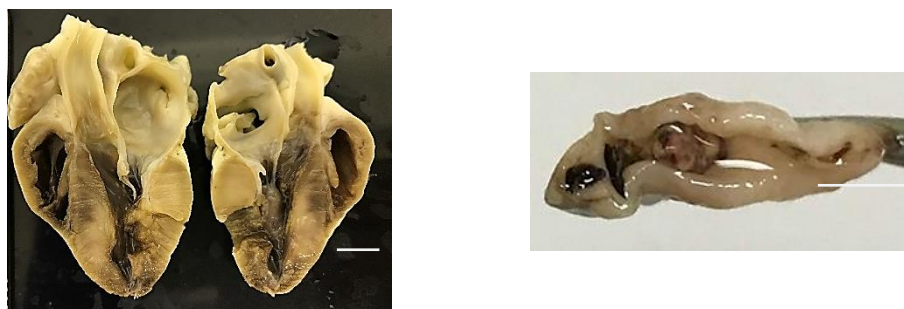

**Figure S1 Gross appearance of the thrombi:** The thrombi retrieved from the LA (Cat ATE 9) had both brown and white portions grossly, whereas the thrombus in the LAA (Cat ATE 12) was pale on the outside. The surface adhering to the endocardium had a relative mixed colour of the brown and white in ATE 9, while that of CHF 8 was primarily white. The LAA thrombus (ATE 12) was not taken out of the appendage so the contact phase between the thrombus, and the endocardium was preserved. Bars next to whole heart = 1 cm; bars next to thrombus = 0.5 cm

## References

33. Wilkie, L.J. Phenotypic progression and cardiac remodelling in feline cardiomyopathies, PhD thesis, Royal Veterinary College, University of London, 2017, Hatfield, UK.
36. Côté, E.; Macdonald, K.A.; Meurs, K.M.; Sleeper, M.M. *Feline Cardiology* 1st ed.; John Wiley & Sons, Inc.: West Sussex, UK, 2011; ISBN 9781118785782.; ISBN 9781118785782.
38. Hansson, K.; Haggstrom, J.; Kvart, C.; Lord, P. LEFT ATRIAL TO AORTIC ROOT INDICES USING TWO-DIMENSIONAL AND M-MODE ECHOCARDIOGRAPHY IN CAVALIER KING CHARLES SPANIELS WITH AND WITHOUT LEFT ATRIAL ENLARGEMENT. *Vet. Radiol. Ultrasound* **2002**, *43*, 568–575, doi:10.1111/j.1740-8261.2002.tb01051.x.
39. März, I.; Wilkie, L.J.; Harrington, N.; Payne, J.R.; Muzzi, R.A.L.; Häggström, J.; Smith, K.; Fuentes, V.L. Familial cardiomyopathy in Norwegian Forest cats. *J. Feline Med. Surg.* **2014**, *17*, 681–691, doi:10.1177/1098612x14553686.
